# Supplementary material
Source: PubMed Central journal article supplement (PMC1785238)

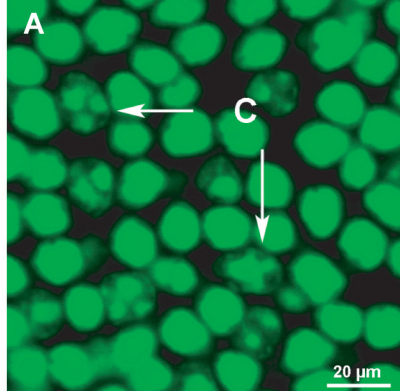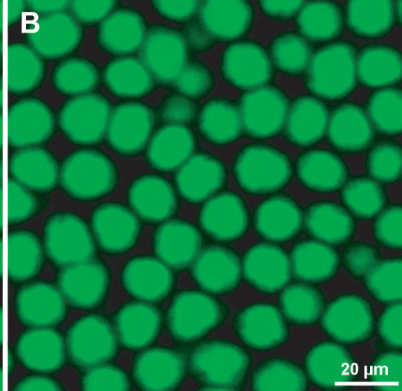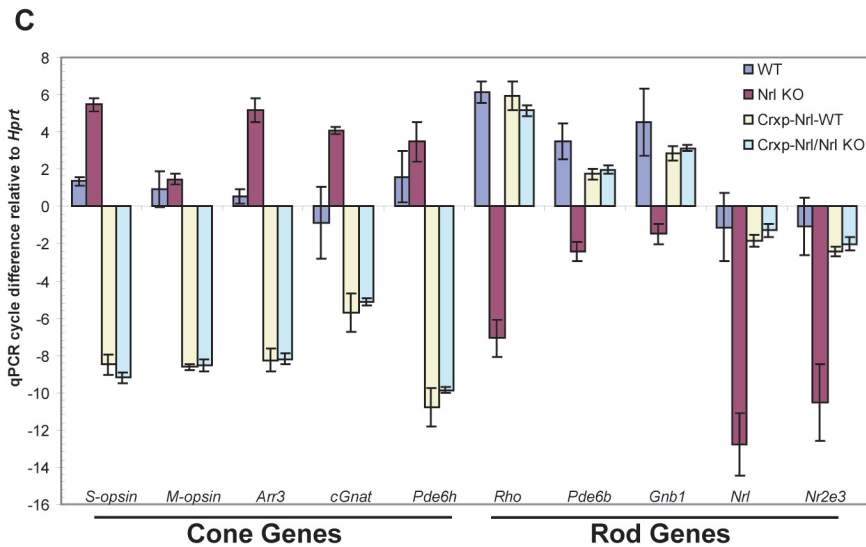

Supplement: pnas_0605934104_1.pdf [file pnas_0605934104_1.pdf]

A

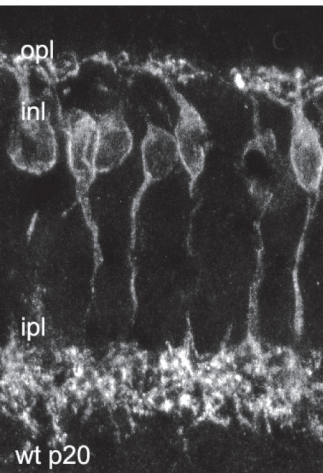

B

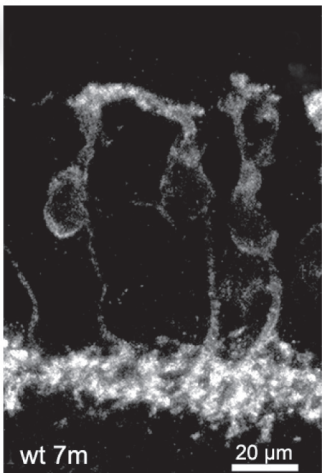

C

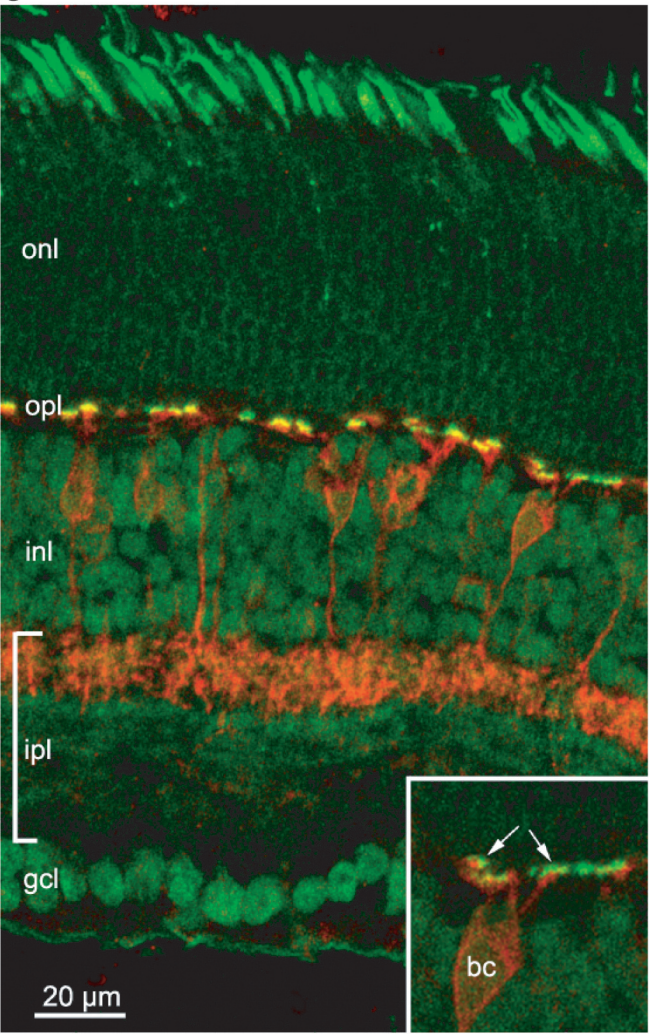

Supplement: pnas_0605934104_2.pdf [file pnas_0605934104_2.pdf]

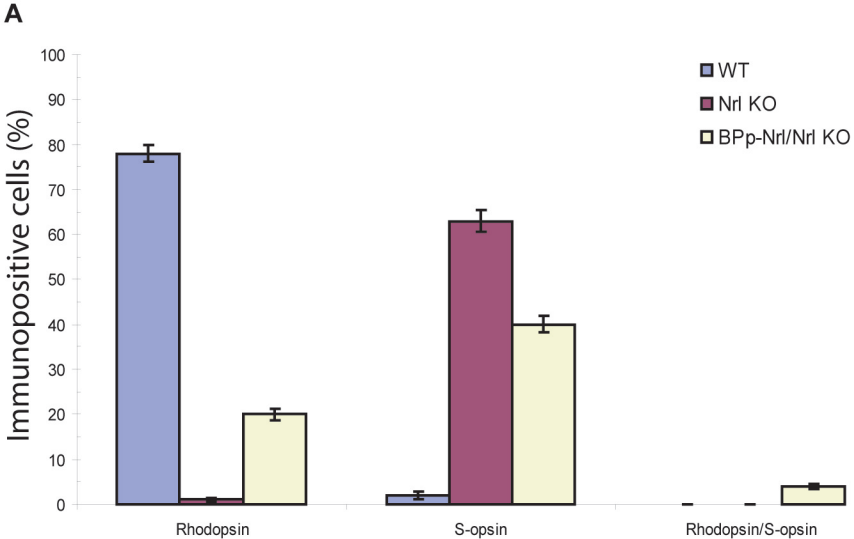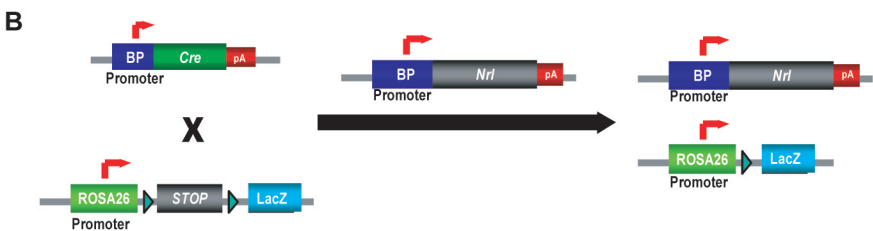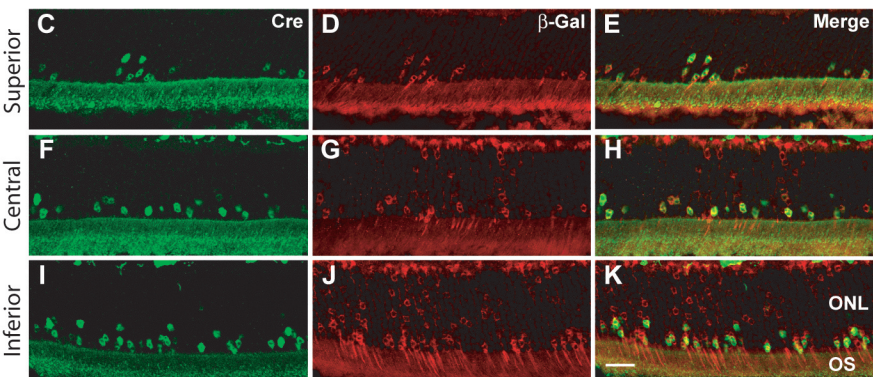

Supplement: pnas_0605934104_3.pdf [file pnas_0605934104_3.pdf]

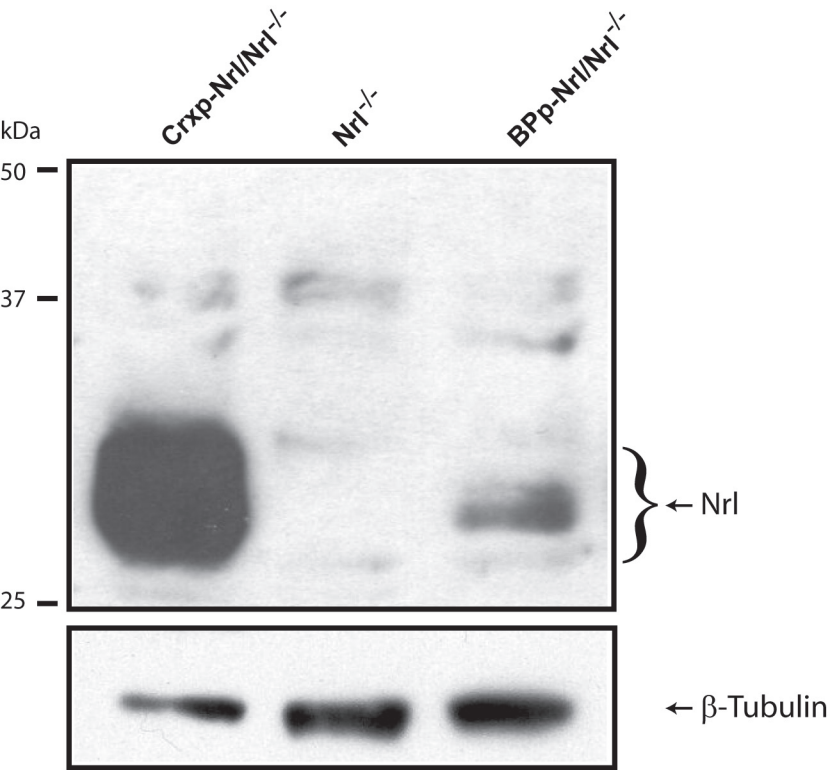

Supplement: pnas_0605934104_4.pdf [file pnas_0605934104_4.pdf]
